# Supplementary material
Source: PubMed Central journal article supplement (PMC3945171)
Supplement: NIHMS541940-supplement-1.pdf [file NIHMS541940-supplement-1.pdf]

ONLINE SUPPLEMENT

**ANG II-SALT HYPERTENSION DEPENDS ON NEURONAL ACTIVITY IN THE  
HYPOTHALAMIC PVN BUT NOT ON LOCAL ACTIONS OF TNF- $\alpha$**

Megan E. Bardgett<sup>1</sup>, Walter W. Holbein<sup>1</sup>, Myrna Herrera-Rosales<sup>1</sup>, Glenn M. Toney<sup>1,2</sup>

<sup>1</sup>Department of Physiology, <sup>2</sup>Center for Biomedical Neuroscience, University of Texas  
Health Science Center at San Antonio, 7703 Floyd Curl Drive,  
San Antonio, TX 78229

Corresponding Author: Megan E. Bardgett, Ph.D.  
Department of Physiology, MC7756  
University of Texas Health Science Center-San Antonio  
7703 Floyd Curl Drive  
San Antonio, TX 78229  
Telephone: (210)-567-3728  
Fax: (210)-567-4410  
E-mail: [bardgett@uthscsa.edu](mailto:bardgett@uthscsa.edu)

### *Immunohistochemistry Methods*

Following transcardial perfusion, brains were removed, post-fixed in 4% PFA at 4°C for 24 h, and transferred to 30% sucrose in 0.1 M PBS for at least 2 days. On the day of use, sections were rinsed 3 times in 0.1 M PBS, then incubated in 0.5% H<sub>2</sub>O<sub>2</sub> in 0.1M PBS for 30 min followed by 1 h incubation in 10% normal goat serum (NGS) in 0.1 M PBS. Sections were permeabilized in 0.5% Triton X-100 for 10 min followed by overnight incubation with a monoclonal mouse anti-rat OX-42 antibody (1:100, Vector Laboratories) at 4°C for 48 h. Sections were rinsed, incubated for 1 h with goat anti-mouse biotinylated secondary antibody (1:200, Vector Laboratories), and incubated in avidin-peroxidase conjugate for 30 min (Vector Laboratories). To control for non-specific staining, separate sections were incubated without primary antibody. To visualize immunoreactive product, sections were incubated with 0.05% 3,3'-diaminobenzidine hydrochloride in the presence of 0.003% H<sub>2</sub>O<sub>2</sub>. The reaction was terminated with an excess of distilled H<sub>2</sub>O and sections were mounted on gelatin coated slides, dehydrated in graded concentrations of ethanol, cleared with xylene, air dried for 1-2 days, and cover-slipped with Cytoseal 60.

### *Results for PVN Histology*

Injection sites marked with rhodamine microspheres were confined to an area encompassing the PVN as previously described by our laboratory<sup>26</sup>. Injections into NT rats (Figure S1) and HT rats (Figure S1) were typically centered on the rostral-caudal midpoint of PVN which included the dorsal cap region as well as magnocellular and parvocellular areas. Rhodamine beads did not enter the third ventricle or spread significantly to areas surrounding the PVN. Distributions of microinjected drugs other than minocycline and etanercept did not differ from those shown.

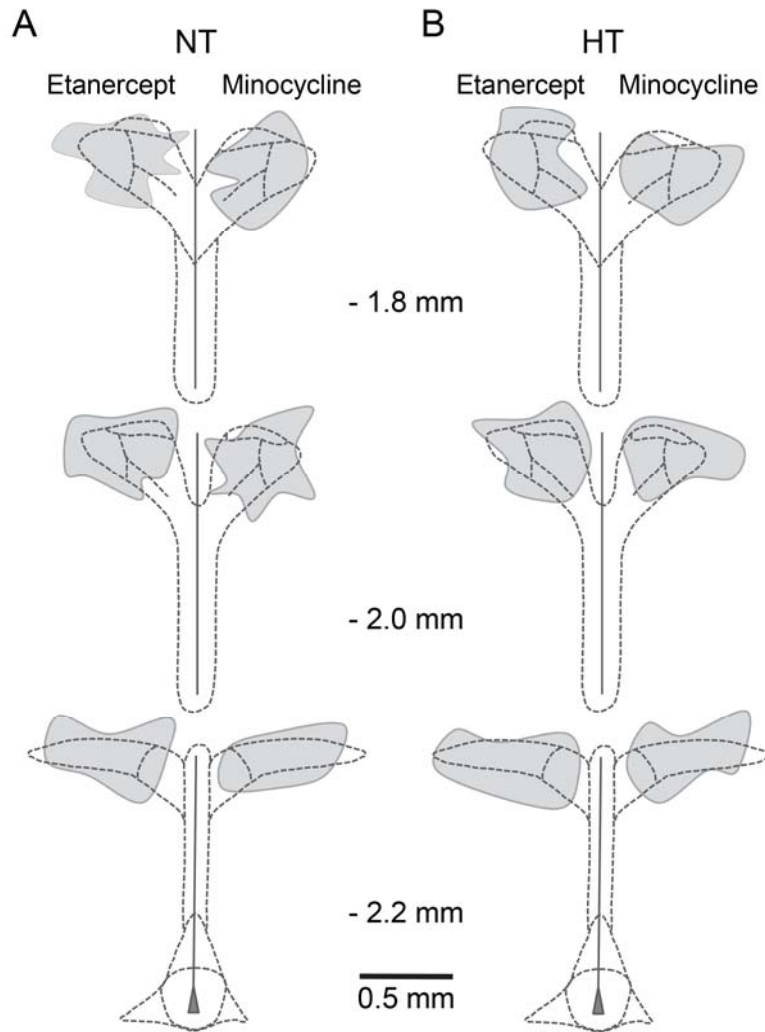

**Figure S1:** Summary of the distribution of PVN injected etanercept and minocycline among NT (**A**) and HT (**B**) rats. Injections delivered drugs within the area of PVN as previously indicated by our laboratory<sup>26, 63</sup>. Note that drugs were injected bilaterally into PVN, but distribution areas are shown unilaterally for clarity.
